# Supplementary material for: Beat-by-Beat Cardiomyocyte T-Tubule Deformation Drives Tubular Content Exchange
Source: PubMed Central journal article supplement — Circ Res. 2020 Nov 24;128(2):203–15. doi: 10.1161/CIRCRESAHA.120.317266 (PMC7834912; doi:10.1161/circresaha.120.317266), 2020-11-24
Supplement: res-128-203-s003.pdf [file res-128-203-s003.pdf]

## Major Resources Table

In order to allow validation and replication of experiments, all essential research materials listed in the Methods should be included in the Major Resources Table below. Authors are encouraged to use public repositories for protocols, data, code, and other materials and provide persistent identifiers and/or links to repositories when available. Authors may add or delete rows as needed.

### Animals (in vivo studies)

| Species                                 | Vendor or Source | Background Strain | Sex | Persistent ID / URL |
|-----------------------------------------|------------------|-------------------|-----|---------------------|
| Rabbit ( <i>Oryctolagus cuniculus</i> ) | Charles River    | New Zealand White | F/M |                     |

### Data & Code Availability

| Description                                | Source / Repository               | Persistent ID / URL |
|--------------------------------------------|-----------------------------------|---------------------|
| MatLab FRAP analysis, C. Zgierski-Johnston | Available from authors on request | n/a                 |
|                                            |                                   |                     |
|                                            |                                   |                     |
